# Supplementary material for: Surface ocean pH and buffer capacity: past, present and future
Source: PubMed Central journal article supplement (PMC6901524; doi:10.1038/s41598-019-55039-4), 2019-12-09
Supplement: 41598_2019_55039_MOESM1_ESM.pdf [file 41598_2019_55039_MOESM1_ESM.pdf]

Supplementary materials for

## **Surface ocean pH and buffer capacity: past, present and future**

Li-Qing Jiang<sup>1,2,\*</sup>, Brendan R. Carter<sup>3,4</sup>, Richard A. Feely<sup>4</sup>, Siv K. Lauvset<sup>5,6</sup>, and Are Olsen<sup>6</sup>

<sup>1</sup> Earth System Science Interdisciplinary Center, University of Maryland, College Park, Maryland, USA.

<sup>2</sup> National Centers for Environmental Information, National Oceanic and Atmospheric Administration, Silver Spring, Maryland, USA.

<sup>3</sup> Joint Institute for the Study of the Atmosphere and Ocean, University of Washington, Seattle, Washington, USA.

<sup>4</sup> Pacific Marine Environmental Laboratory, National Oceanic and Atmospheric Administration, Seattle, Washington, USA.

<sup>5</sup> NORCE Norwegian Research Centre, Bjerknes Centre for Climate Research, Bergen, Norway.

<sup>6</sup> Geophysical Institute, University of Bergen and Bjerknes Centre for Climate Research, Bergen, Norway.

\* Corresponding author: L.-Q. Jiang, Earth System Science Interdisciplinary Center, University of Maryland, 5825 University Research Court, College Park, MD 20740, USA. (Liqing.Jiang@noaa.gov).

[The scientific results and conclusions, as well as any views or opinions expressed herein, are those of the authors and do not necessarily reflect the views of NOAA or the Department of Commerce.]

**Table S1.** The reaction of carbonic system species to a temperature change of 20 to 25°C in a closed system with constant dissolved inorganic carbon (DIC) and total alkalinity (TA). The calculation is based on an imaginary seawater with SST, salinity, DIC, and TA of 18.35°C, 34.87, 2020  $\mu\text{mol kg}^{-1}$ , 2306  $\mu\text{mol kg}^{-1}$ , respectively. The rightmost column shows how fugacity of carbon dioxide ( $f\text{CO}_2$ ) would change if all of the hydrogen ion ( $\text{H}^+$ ) change were used to react with bicarbonate ( $\text{HCO}_3^-$ ) to form aqueous  $\text{CO}_2$  ( $\text{CO}_2^*$ , a combination of both dissolved  $\text{CO}_2$  and carbonic acid, or  $\text{H}_2\text{CO}_3$ ) (or reverse) and the  $\text{CO}_2$  solubility remained constant at the 20°C level. Please note that in this example, we used a temperature change of 20 to 25°C. Their values could be very different at other temperature change intervals. This is especially true for the dissociation of water ( $\text{H}_2\text{O}$ ).

|                                                                          | <b>Processes</b>                                                           | <b><math>\text{H}^+</math> change<br/>(<math>\mu\text{mol/kg}</math>)</b> | <b><math>f\text{CO}_2</math> change<br/>(<math>\mu\text{atm}</math>)</b> |
|--------------------------------------------------------------------------|----------------------------------------------------------------------------|---------------------------------------------------------------------------|--------------------------------------------------------------------------|
| Generating $\text{H}^+$                                                  | $\text{HCO}_3^-$ dissociation                                              | +1.99                                                                     | 61                                                                       |
|                                                                          | $\text{H}_2\text{O}$ dissociation                                          | +1.55                                                                     | 48                                                                       |
| Consuming $\text{H}^+$                                                   | Reacting with $\text{B}(\text{OH})_4^-$ to form $\text{B}(\text{OH})_3$    | -2.72                                                                     | -84                                                                      |
|                                                                          | Reacting with $\text{HCO}_3^-$ to form $\text{CO}_2^*$                     | -0.82                                                                     | <b>25</b>                                                                |
| $\text{H}^+$ surplus                                                     | Staying as free $\text{H}^+$ or forming $\text{H}_3\text{O}^+$ to lower pH | <b>0.0015</b>                                                             | -0.05                                                                    |
| $f\text{CO}_2$ change due to $K_0$ change                                | $K_0$ decreases with increasing temperature                                | N/A                                                                       | <b>53</b>                                                                |
| $f\text{CO}_2$ change due to changes in both $[\text{CO}_2^*]$ and $K_0$ | N/A                                                                        | N/A                                                                       | 78                                                                       |

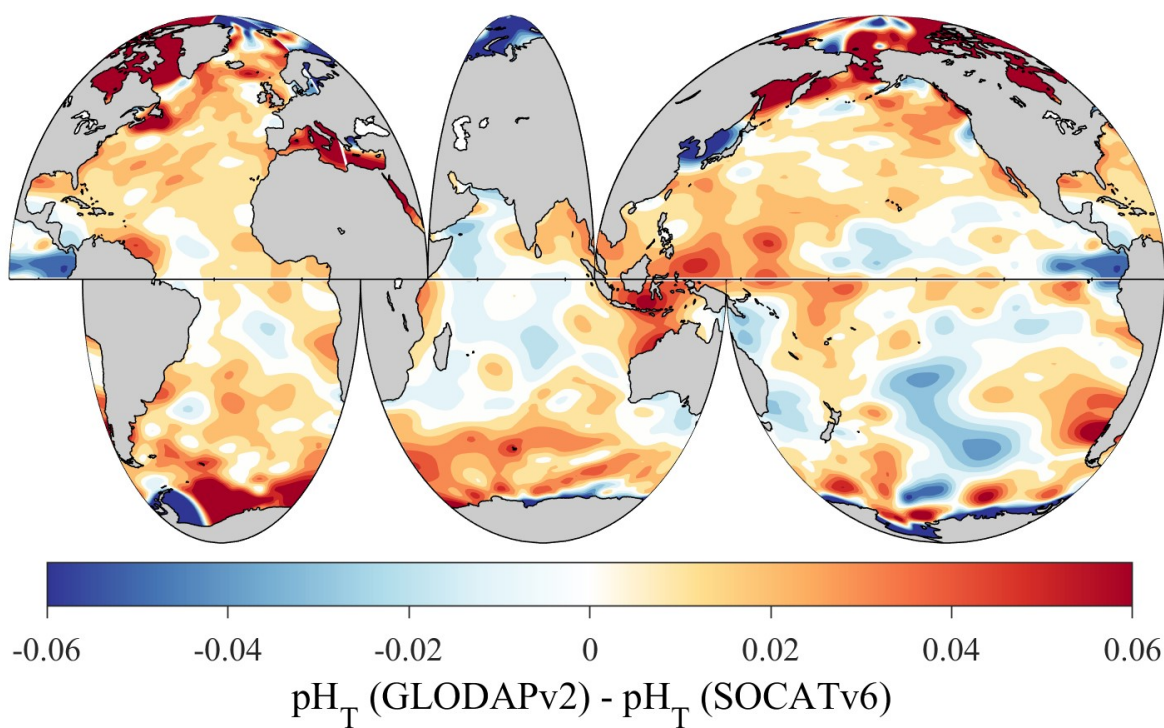

**Figure S1.** The difference between surface  $\text{pH}_T$  based on the 2<sup>nd</sup> version of the Global Ocean Data Analysis Project (GLODAPv2) and that of the 6<sup>th</sup> version of the Surface Ocean CO<sub>2</sub> Atlas (SOCATv6).

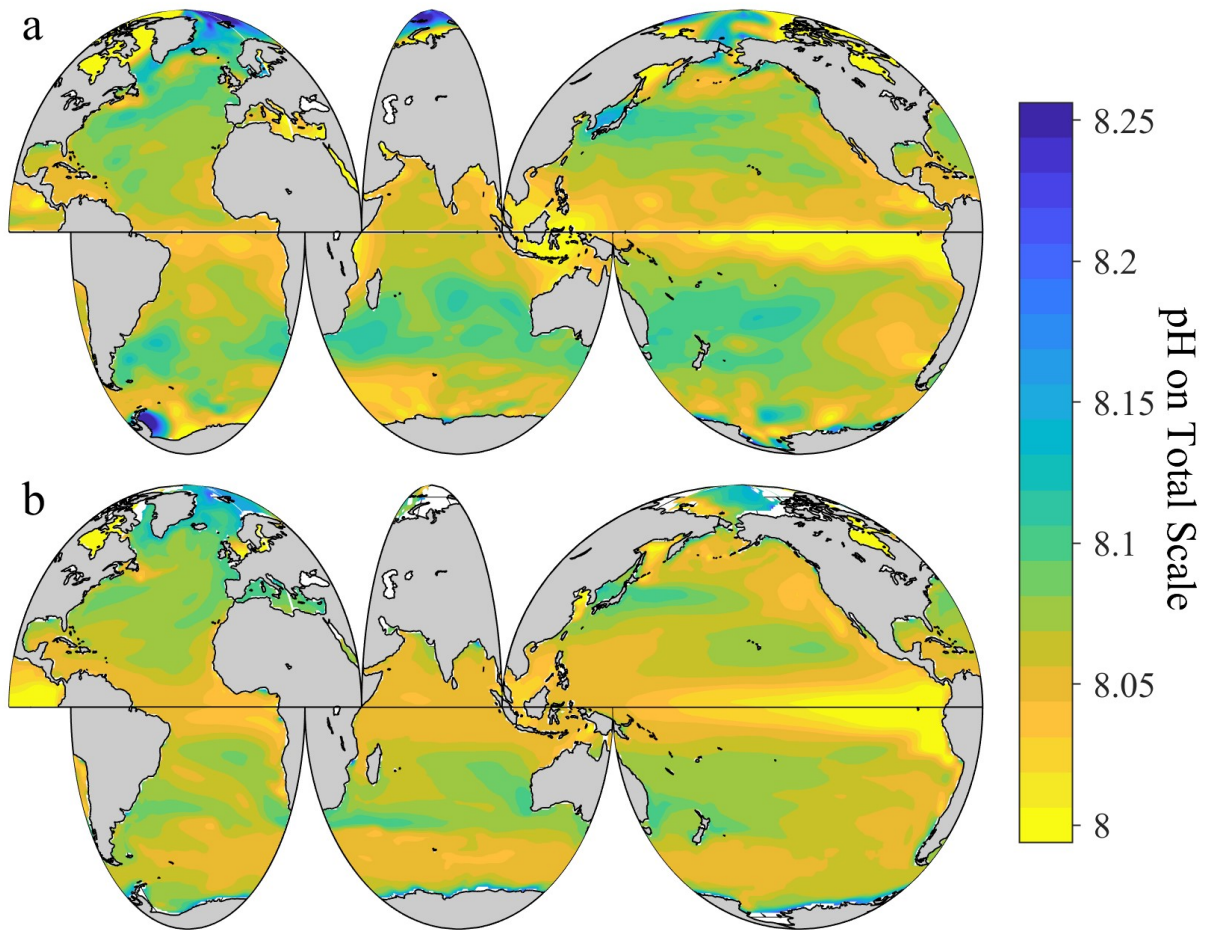

**Figure S2.** Climatological distribution of global surface ocean pH on the total hydrogen scale ( $\text{pH}_T$ , annually averaged) at *in-situ* temperature and adjusted for the year 2000. Panel a, the global surface ocean  $\text{pH}_T$  based on the 6<sup>th</sup> version of the Surface Ocean  $\text{CO}_2$  Atlas (1991 to 2018, ~23 million observations). Panel b, the global surface ocean  $\text{pH}_T$  extracted from the Geophysical Fluid Dynamics Laboratory (GFDL)'s ESM2M Model.



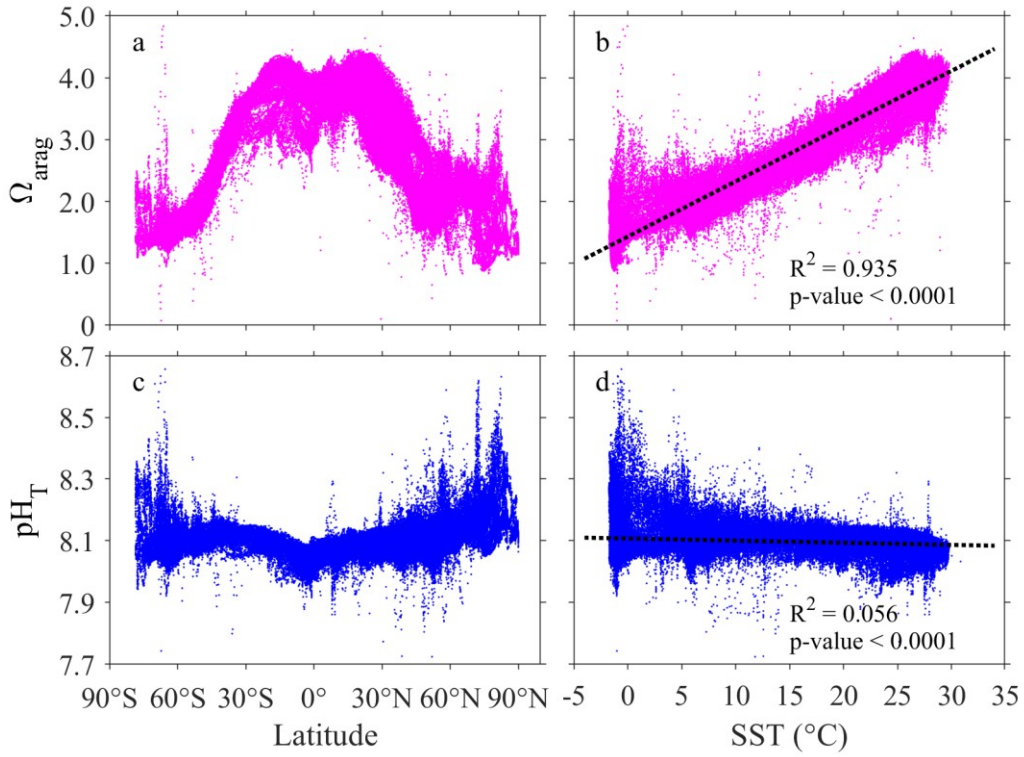

**Figure S3.** Plots of surface ocean aragonite saturation state ( $\Omega_{\text{arag}}$ ) and pH on the total hydrogen scale ( $\text{pH}_T$ ) against both latitude and sea surface temperature (SST). Panel **a**, plot of  $\Omega_{\text{arag}}$  against latitude. Panel **b**, plot of  $\Omega_{\text{arag}}$  against SST. Panel **c**, plot of  $\text{pH}_T$  against latitude. Panel **d**, plot of  $\text{pH}_T$  against SST.

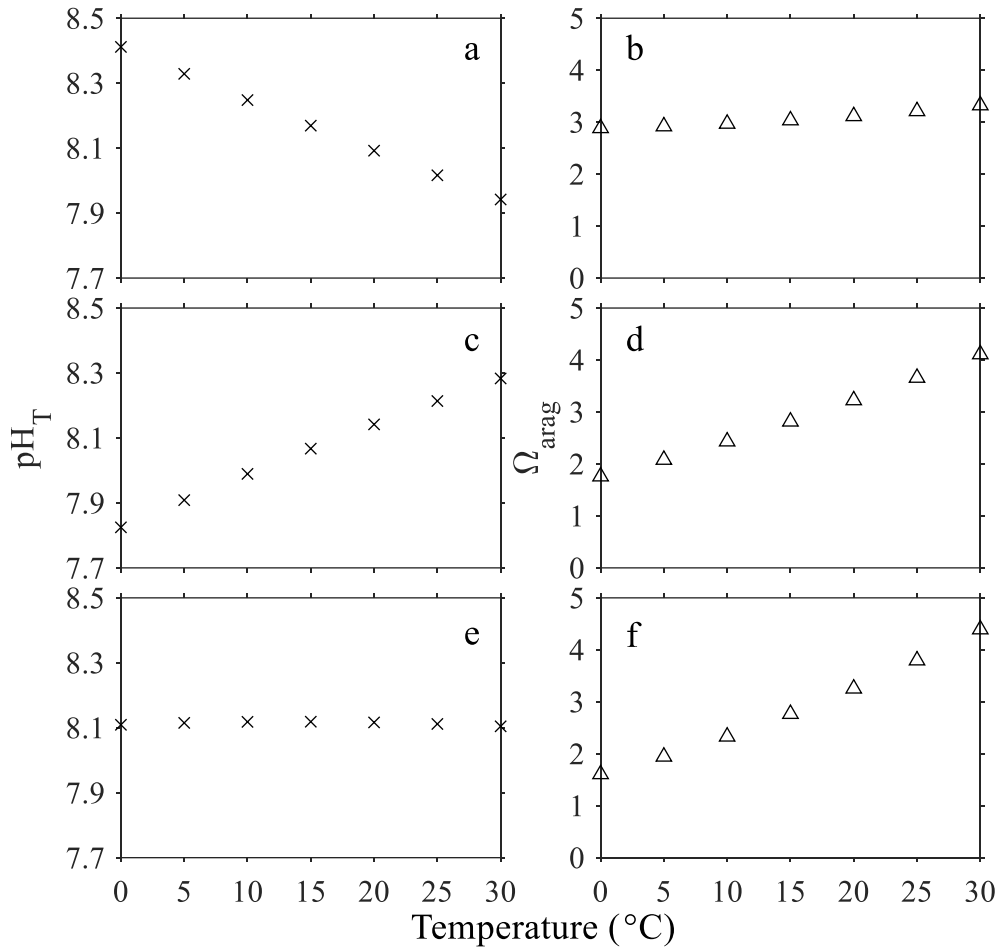

**Figure S4.** Plots of pH on the total hydrogen scale (pH<sub>T</sub>), and aragonite saturation state (Ω<sub>arag</sub>) under the two aspects of temperature influences against water temperature.

Panels **a** and **b**, plots of pH<sub>T</sub> and Ω<sub>arag</sub> that are calculated by assuming constant TA and DIC but varying temperature (from 0 °C at the poles to 30 °C at the Equator). Panels **c** and **d**, plots of pH<sub>T</sub> and Ω<sub>arag</sub> that are calculated by assuming constant TA and *p*CO<sub>2</sub>, varying input temperature, but a constant output temperature. Panels **e** and **f**, plots of pH<sub>T</sub> and Ω<sub>arag</sub> that were calculated by assuming constant TA and *p*CO<sub>2</sub>, varying both input and output temperature.

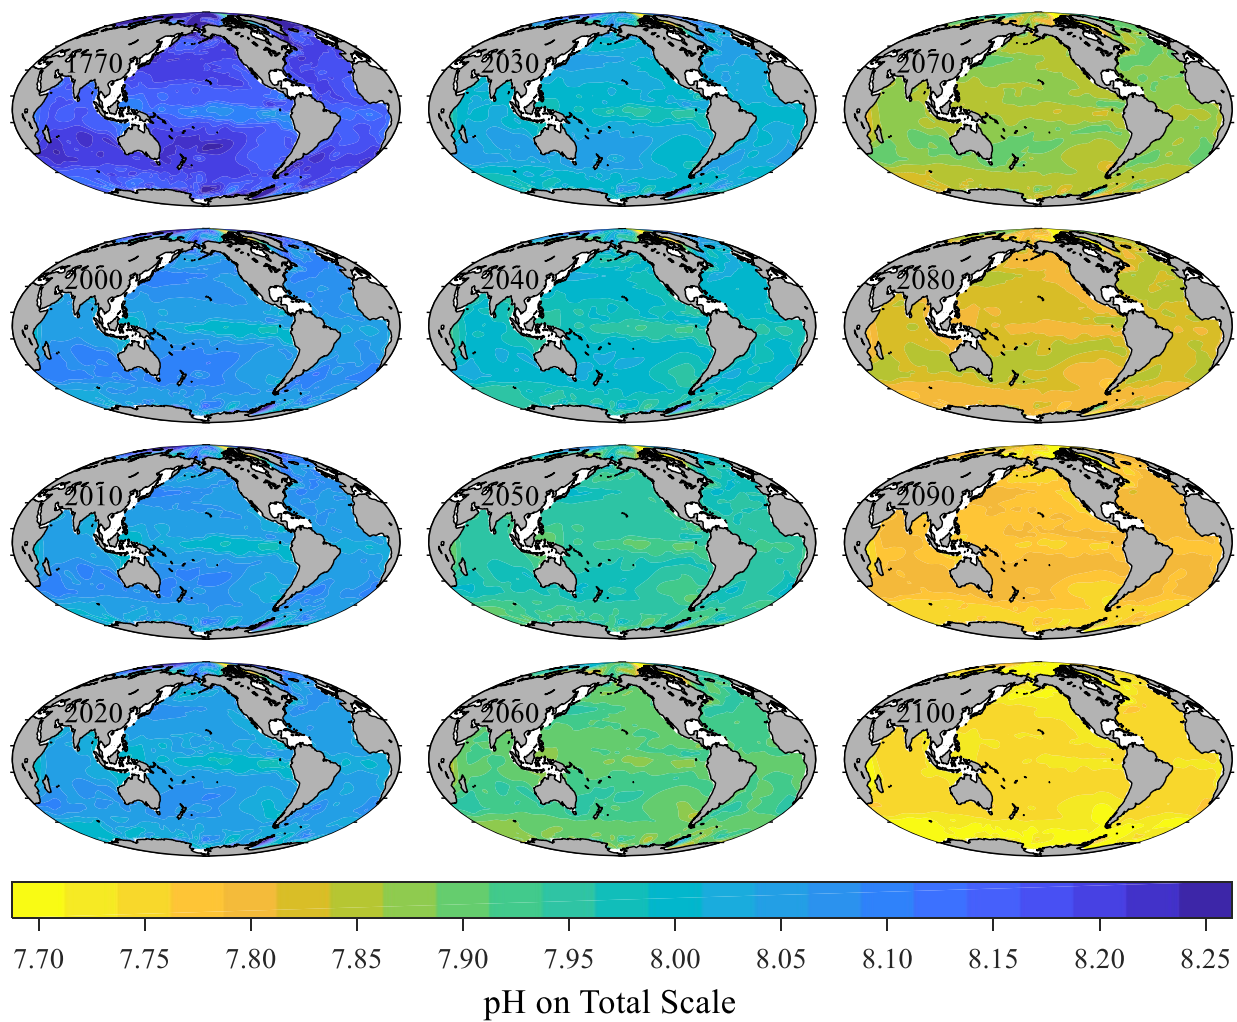

**Figure S5.** Surface water pH on total hydrogen scale ( $\text{pH}_T$ , annually averaged) in 1770, 2000, and all decades of the 21<sup>st</sup> Century under the Intergovernmental Panel on Climate Change (IPCC) Representative Concentrations Pathways (RCP8.5) Scenario.

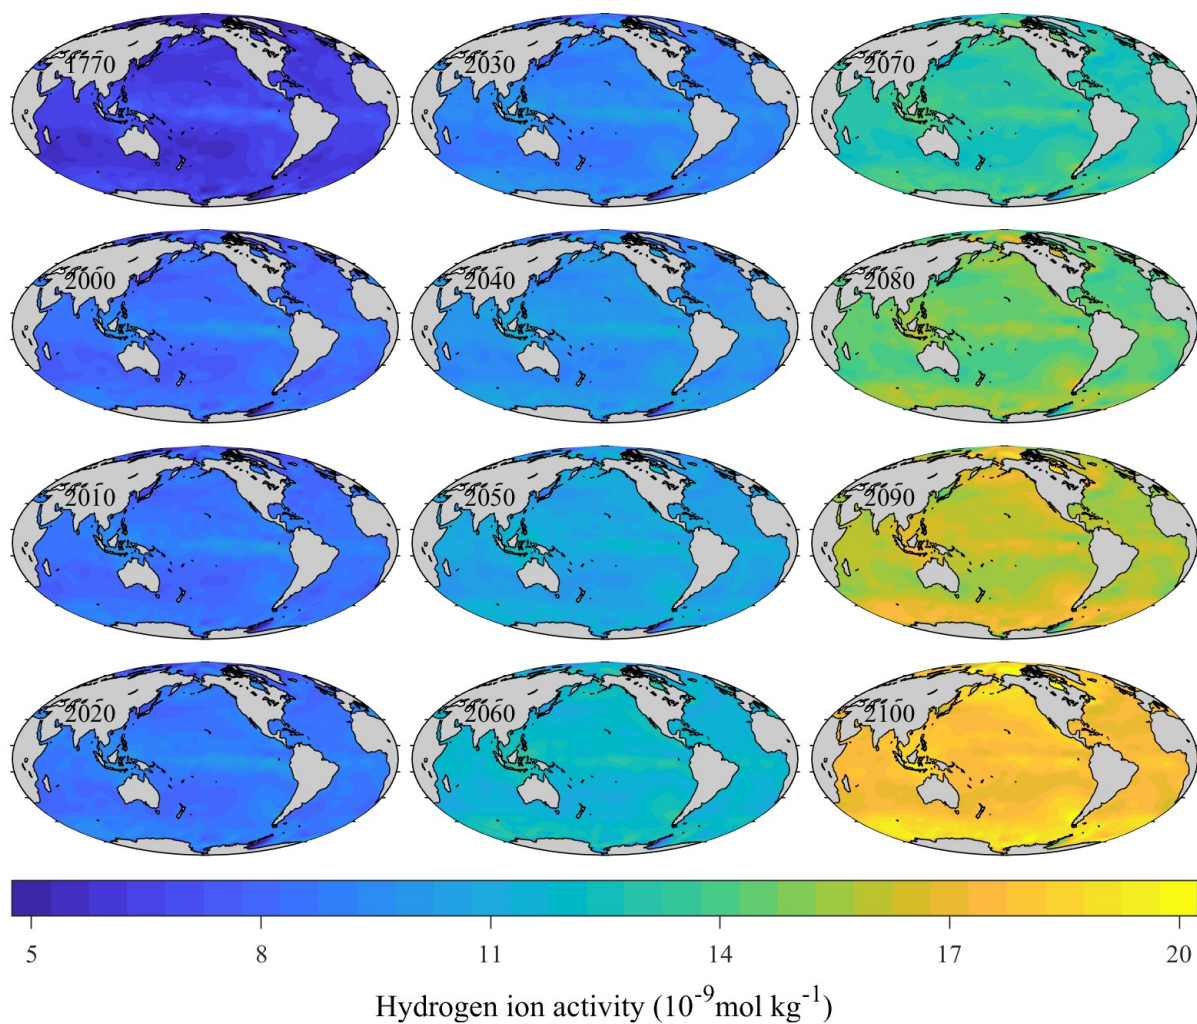

**Figure S6.** Surface water hydrogen ion activity ( $[H^+]$ , annually averaged, unit:  $10^{-9} \text{ mol kg}^{-1}$ ) in 1770, 2000, and all decades of the 21<sup>st</sup> Century under the IPCC RCP8.5 Scenario.



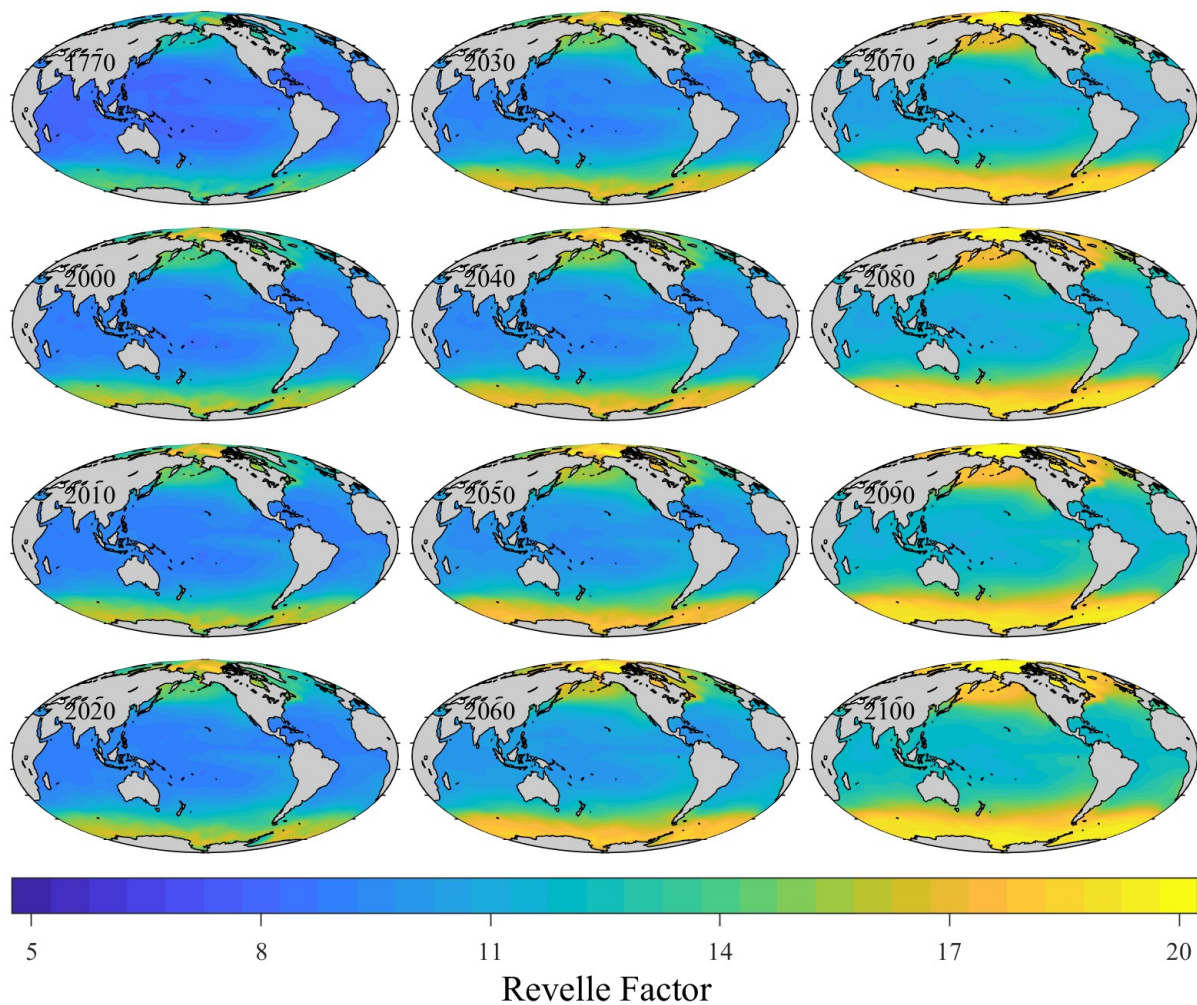

**Figure S7.** Surface water Revelle Factor (annually averaged) in 1770, 2000, and all decades of the 21<sup>st</sup> Century under the IPCC RCP8.5 Scenario. Revelle Factor is a measure of the ocean’s buffer capacity (the higher the Revelle Factor, the lower the ocean’s buffer capacity).

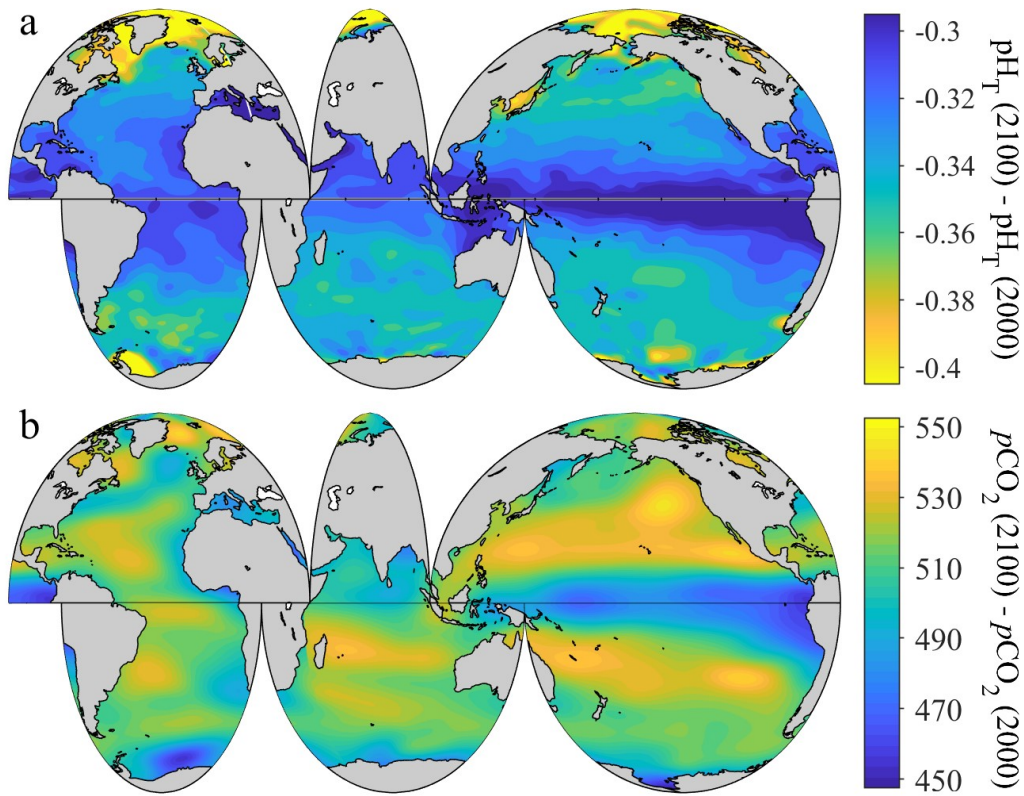

**Figure S8.** Long-term changes of surface ocean pH on the total hydrogen scale ( $\text{pH}_T$ ) and partial pressure of carbon dioxide ( $p\text{CO}_2$ ) from 2000 to 2100. Panel **a**, the global surface ocean  $\text{pH}_T$  change from 2000 to 2100. Panel **b**, the global surface ocean  $p\text{CO}_2$  change ( $\mu\text{atm}$ ) from 2000 to 2100 under the IPCC RCP8.5 Scenario.

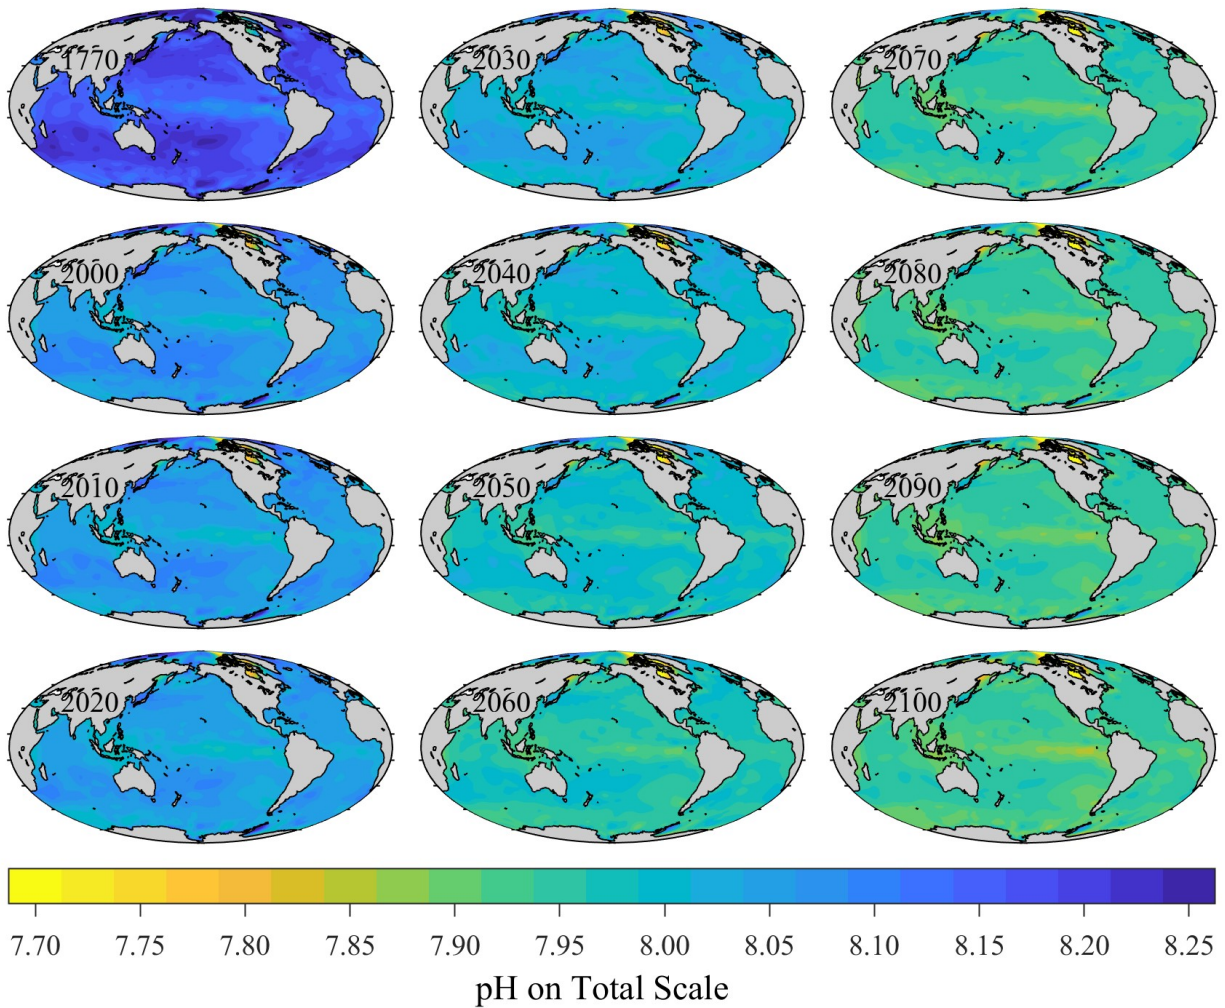

**Figure S9.** Surface water pH on total hydrogen scale ( $\text{pH}_T$ , annually averaged) in 1770, 2000, and all decades of the 21<sup>st</sup> Century under the IPCC RCP4.5 Scenario.



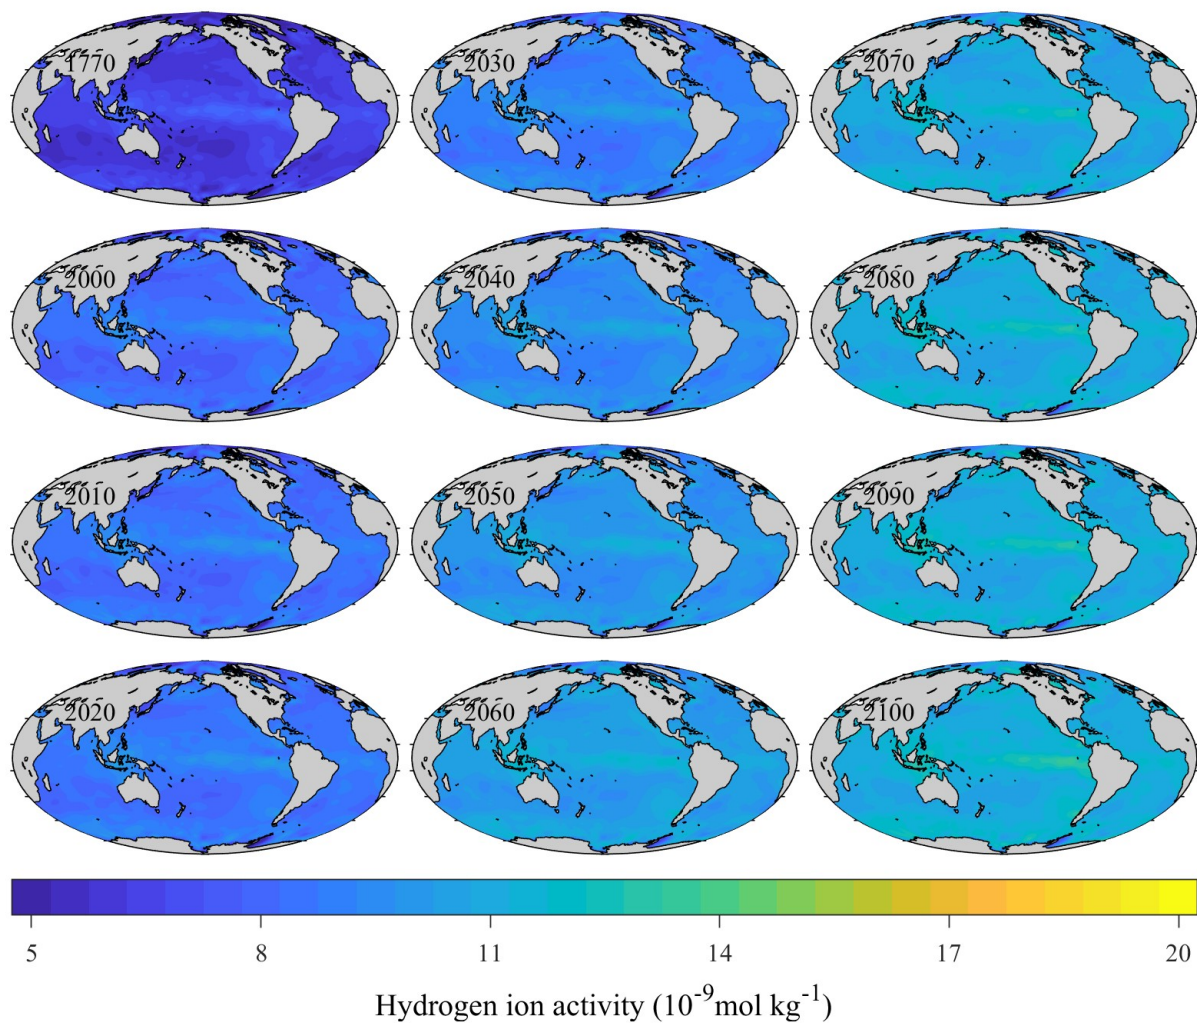

**Figure S10.** Surface water hydrogen ion activity ( $[\text{H}^+]$ , annually averaged,  $10^{-9} \text{ mol kg}^{-1}$ ) in 1770, 2000, and all decades of the 21<sup>st</sup> Century under the IPCC RCP4.5 Scenario.

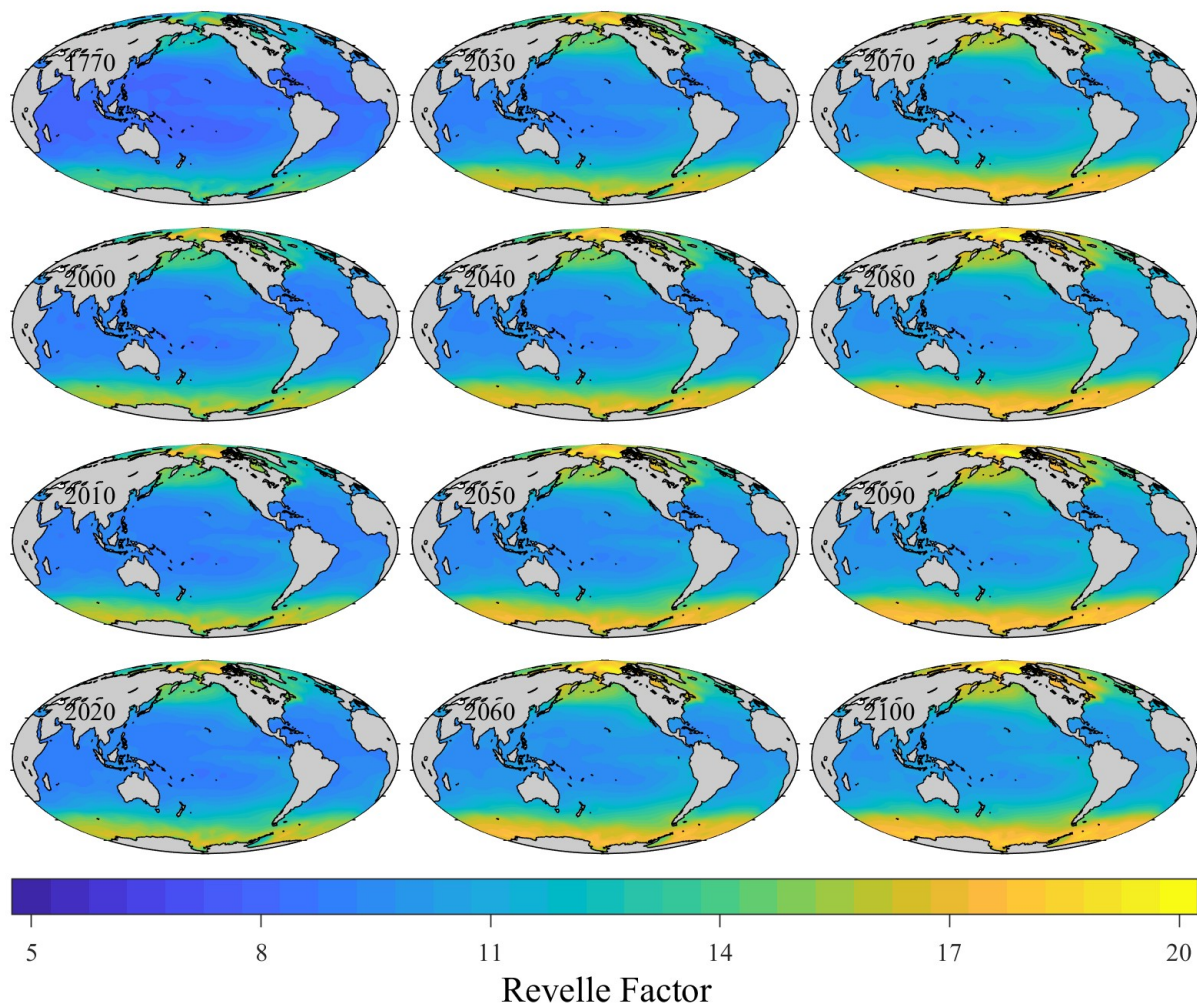

**Figure S11.** Surface water Revelle Factor (annually averaged) in 1770, 2000, and all decades of the 21<sup>st</sup> Century under the IPCC RCP4.5 Scenario. Revelle Factor is a measure of the ocean's buffer capacity (the higher the Revelle Factor the lower the ocean's buffer capacity).

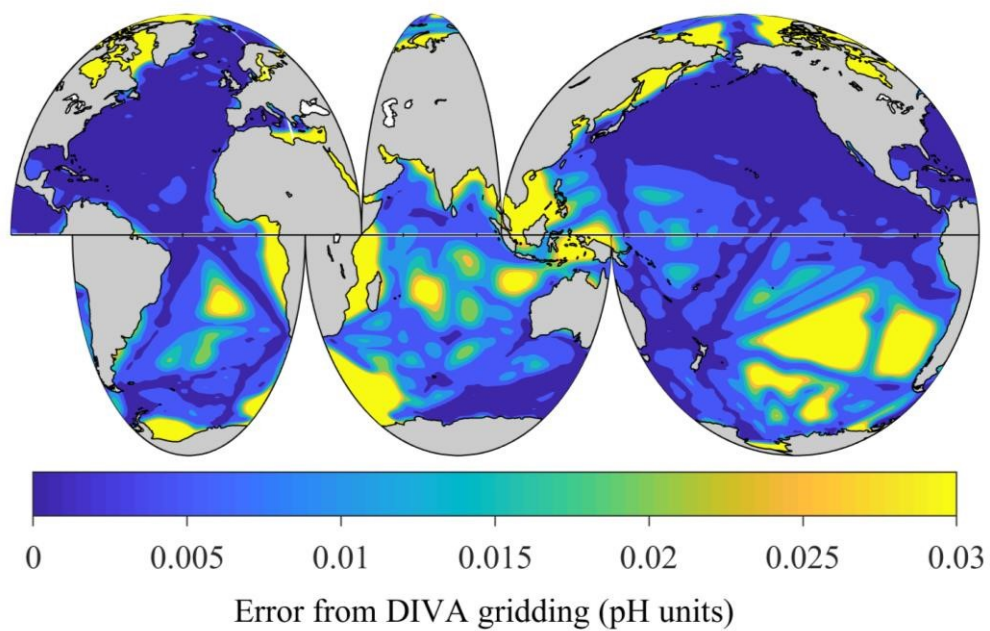

**Figure S12.** Surface ocean pH uncertainty from spatial gridding using the Data-Interpolating Variational Analysis (DIVA).
